# Supplementary material for: Reassignment of a rare sense codon to a non-canonical amino acid in Escherichia coli
Source: PubMed Central journal article supplement (PMC4652775; doi:10.1093/nar/gkv787), 2015-08-03
Supplement: supp_gkv787_Supplementary_Mukai_correction.pdf [file supp_gkv787_Supplementary_Mukai_correction.pdf]

**Reassignment of a rare sense codon to a non-canonical amino acid in  
*Escherichia coli***

Takahito Mukai, Atsushi Yamaguchi, Kazumasa Ohtake, Mihoko Takahashi, Akiko Hayashi, Fumie Iraha, Satoshi Kira, Tatsuo Yanagisawa, Shigeyuki Yokoyama, Hiroko Hoshi, Takatsugu Kobayashi and Kensaku Sakamoto

This PDF file includes:

Supplementary Discussion

Supplementary Figures S1-S10

Supplementary Tables S1-S8

## SUPPLEMENTARY DISCUSSION

The safe arginine-to-homoarginine replacements at the 11 AGG positions in the 6 essential genes may be explained on the basis of their reported protein structures. Among the 11 arginine residues, only Arg283 in CdsA is not conserved among the orthologs and may be replaceable with other amino acids. The other 10 arginine residues are completely conserved among the *Enterobacteriaceae* family members, including *E. coli*. Arg156 in IspU is bound to the main chain of Asp170 and Ile172 in the other subunit (PDB ID: 3QAS) and may be replaceable with L-homoarginine, because this arginine residue is replaced by lysine in some of the eukaryotic orthologs. Arg245 in RseP forms a salt bridge with Glu223 on the protein surface (PDB ID: 3ID2), and may be changed to L-homoarginine without destroying the salt bridge. Arg278 in RseP forms a salt bridge with Asp244 and a hydrogen bond with the main chain of Gly239, and is partially buried at the protein surface (PDB IDs: 3ID2). These interactions may be partially destabilized by the arginine-to-homoarginine replacement. Arg194 in IspU participates in a hydrogen bond network and is mostly buried in the protein core (PDB ID: 3QAS), and the hydrogen bond network may be restructured by the arginine-to-homoarginine replacement. Arg175 in DnaE recognizes the substrate  $\text{PO}_4^{3-}$  (PDB IDs: 2HNH and 2HQA), and may be changed to L-homoarginine without affecting the substrate specificity, because DnaE has sufficient space to accommodate the longer side chain of L-homoarginine. In DnaE, Arg981, Arg1091, and Arg1121 may be located around the interface with the subunits and the DNA substrate [Lamers, M. H., Georgescu, R. E., Lee, S. G., O'Donnell, M. and Kuriyan, J. (2006) Crystal structure of the catalytic alpha subunit of *E. coli* replicative DNA polymerase III. *Cell*, **126**, 881–892], and may be replaceable with L-homoarginine, because the interactions between large proteins and DNA would not be severely destabilized by such small changes. Arg8 in RnpA may form a long-distance contact with the sugar-phosphate backbone of the RNaseP RNA (PDB IDs: 2LJP and 3Q1R), and thus may be changed to L-homoarginine without hindering this interaction. Arg22 in RF-2 bridges two  $\alpha$ -helices and is located around the putative interface with RF-3 (PDB ID: 1GQE). RF2 may have sufficient space to accommodate the longer side chain of L-homoarginine without forming a protruding bulge. The observation that the wildtype proteins were more functional than the L-homoarginine-substituted variants suggests that the guanidino groups were moved from the original positions in some of these proteins. The observation that some of these 11 arginine residues cannot be replaced with L-NIL suggests that these groups were still essential for the functions of some of these proteins.

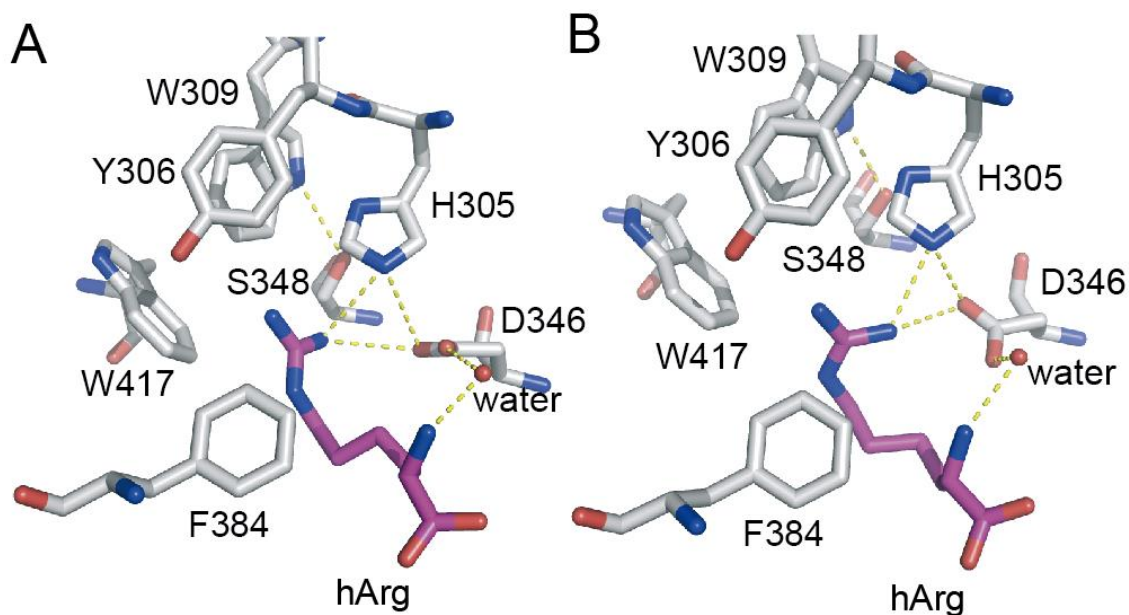

**Figure S1.** Structure models for the amino-acid binding pocket of the L-homoarginine-specific PylRS variant (HarRS). The two similar models (A, the same as Figure 1B, and B) were obtained with two different initial conditions for the manual docking of L-homoarginine. L-Homoarginine is represented by sticks, with the carbon atoms shown in purple.

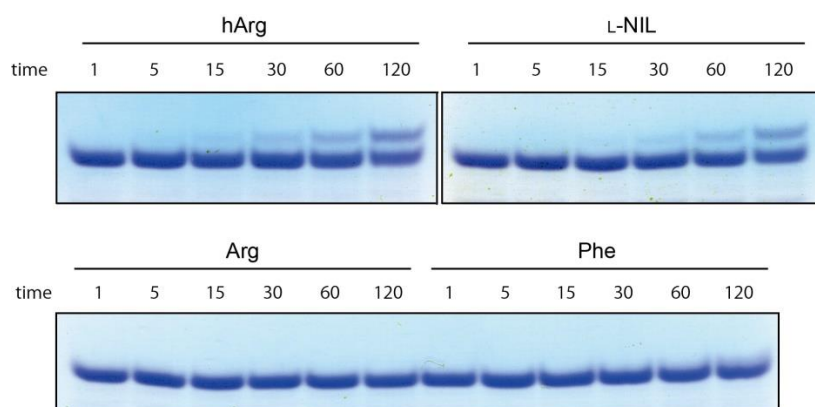

**Figure S2.** The acylation of tRNA<sup>Pyl</sup> with hArg, L-NIL, arginine, and phenylalanine by HarRS was analyzed by acid urea PAGE followed by the staining with toluidine blue. The reaction was performed at 37 °C for the indicated durations (min). The bands shifted upwards on the gel correspond to the acylated tRNA. The extent of the upward shift and the intensity of the shifted band were subtle for Phe. The proportion of the acylated molecules amounted to 26% and 22% for hArg and L-NIL, respectively, at the end of the 2-hr incubation. The increase in the acylated proportion was nearly linear for both amino acids over the indicated time range of incubation.

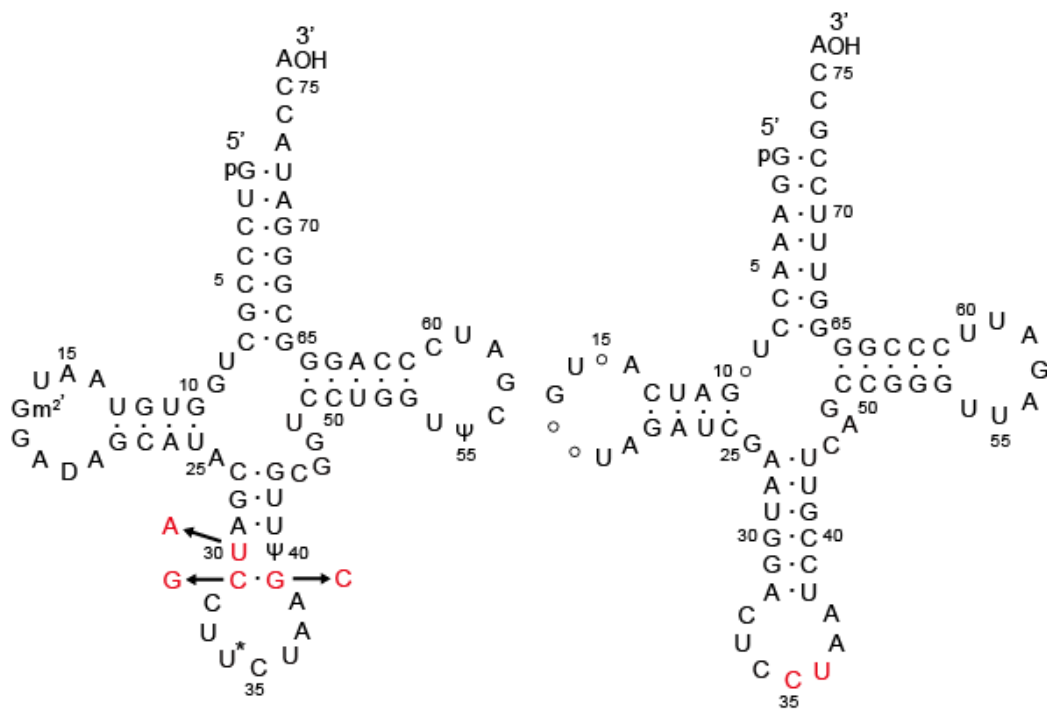

**Figure S3.** The secondary structures of the variant of T4 tRNA<sup>Arg</sup><sub>UCU</sub> (tRNA<sup>T4</sup><sub>UCU</sub>) (left) and *Methanosarcina mazei* tRNA<sup>Pyl</sup><sub>CCU</sub> (right). The base substitutions are shown in red.

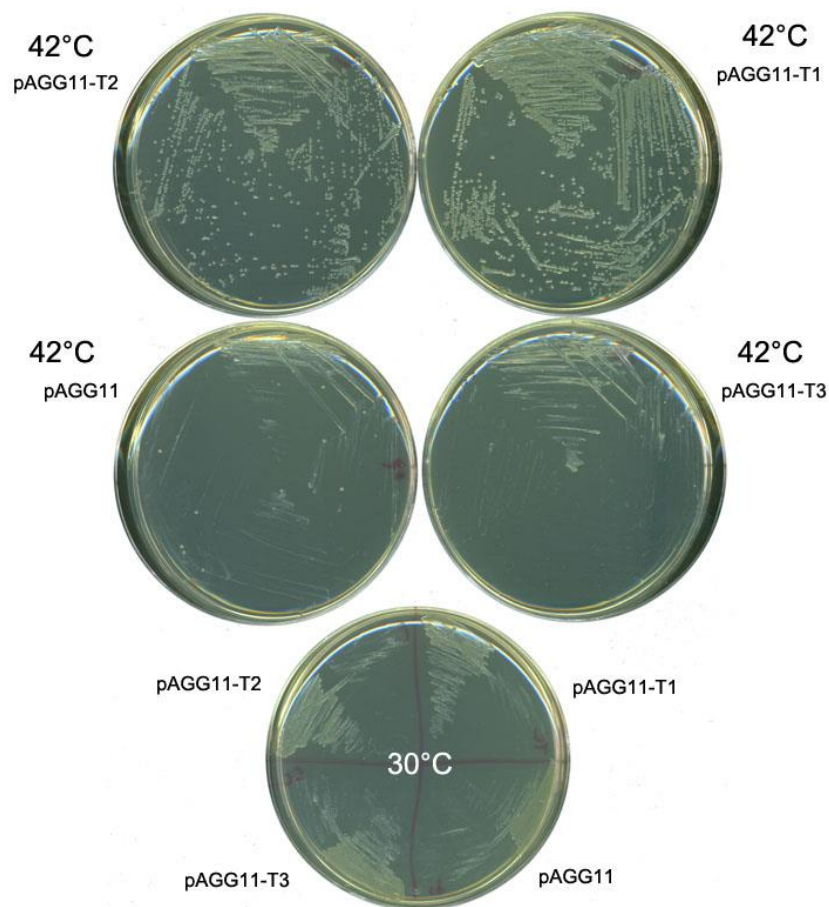

**Figure S4.** The complementation of the temperature-sensitivity of AGG-27.2 by expressing tRNA<sup>T<sub>4</sub></sup><sub>UCU</sub> from various promoters. AGG-27.2 was transformed with pAGG11, pAGG11-T1, pAGG11-T2, and pAGG11-T3. The transformed cells were inoculated on LB agar plates and incubated at 30°C or 42°C for two days.

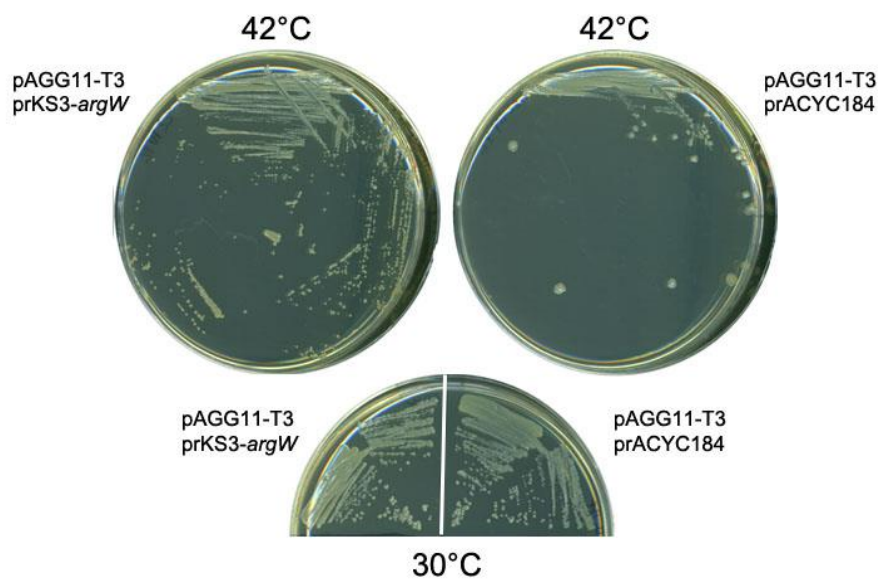

**Figure S5.** The complementation of the temperature sensitivity of AGG-27.2 by co-expressing  $tRNA^{T4}_{UCU}$  and  $tRNA^{Arg5}$ . AGG-27.2 cells were transformed with pAGG11-T3 and a control plasmid (prACYC184), or with pAGG11-T3 and prKS3-argW. The transformants were inoculated on LB agar plates and incubated at 30°C and 42°C for two days.

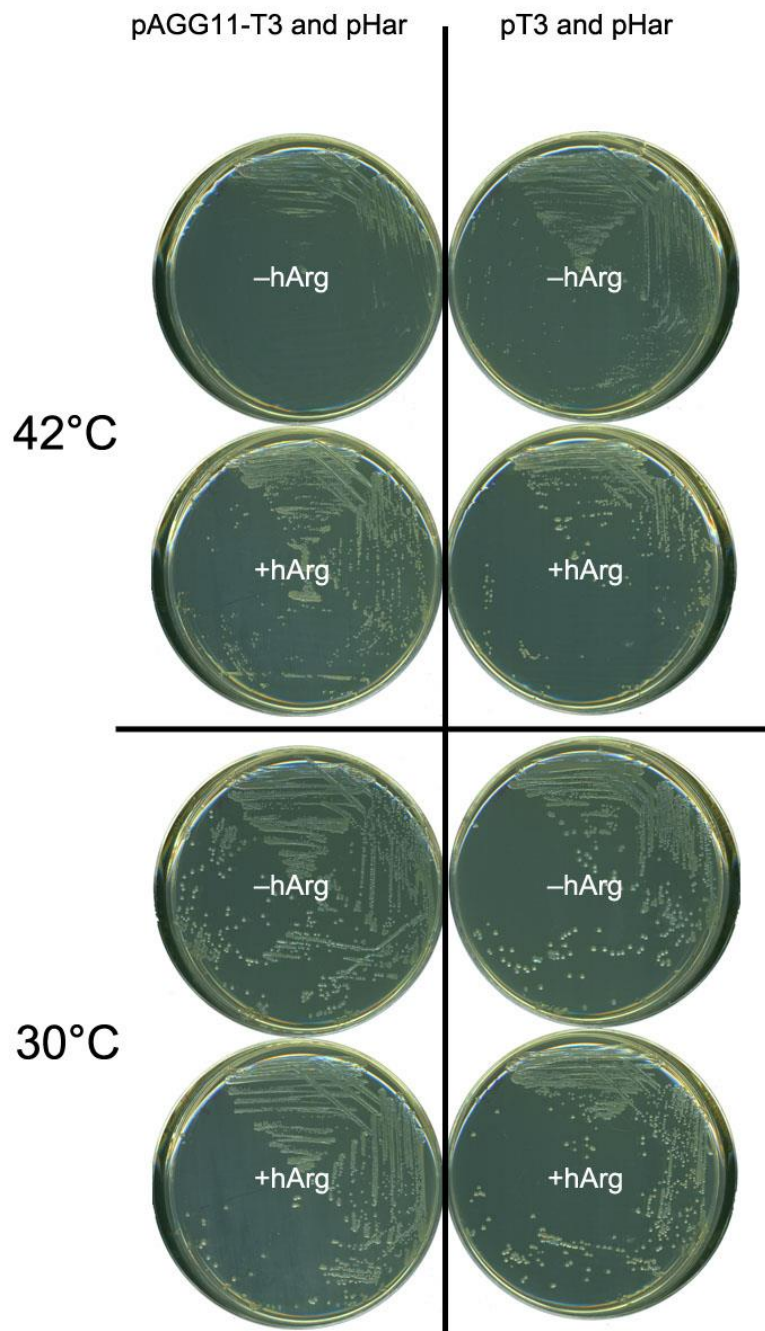

**Figure S6.** The complementation of the temperature-sensitivity of AGG-27.2 by reassigning AGG to L-homoarginine. The AGG-27.2 cells were transformed with pAGG11-T3 and pHar (the left column of the plates), and with pT3 and pHar (the right column). The transformants were inoculated on LB agar plates with or without L-homoarginine (hArg), and incubated at 30°C and 42°C for two days.

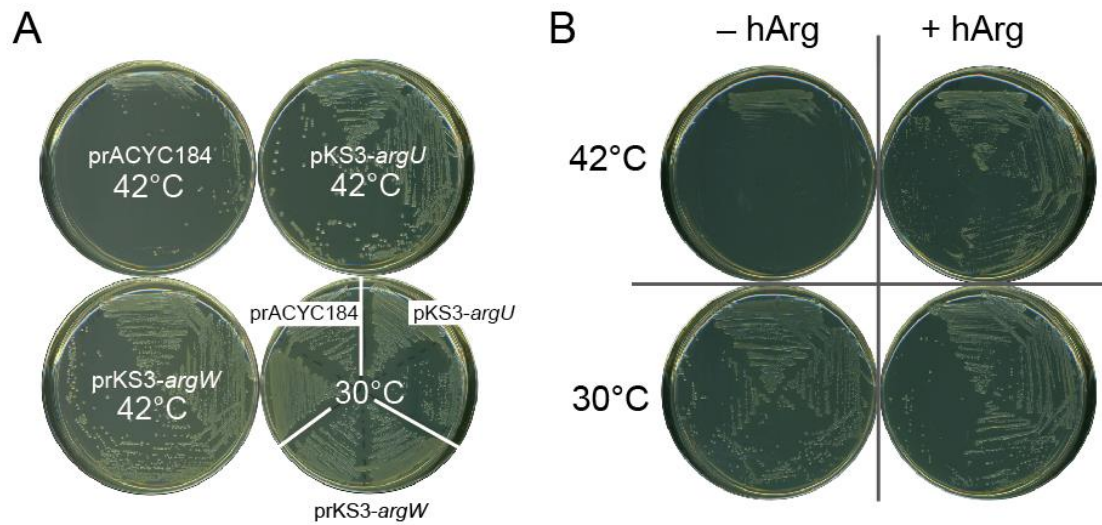

**Figure S7.** (A) The complementation of the temperature-sensitivity of AGG-27.3 by expressing tRNA<sup>Arg5</sup> or tRNA<sup>Arg4</sup>. The AGG-27.3 cells transformed with prKS3-argW, pKS3-argU, or a control plasmid (prACYC184) were inoculated on LB agar plates, and incubated overnight at 30°C and 42°C. (B) The complementation of the temperature-sensitivity of AGG-27.3 by reassigning AGG to L-homoarginine (hArg). The AGG-27.3 cells transformed with pHar were inoculated on LB agar plates with or without hArg, and incubated for one day at 30°C and 42°C.



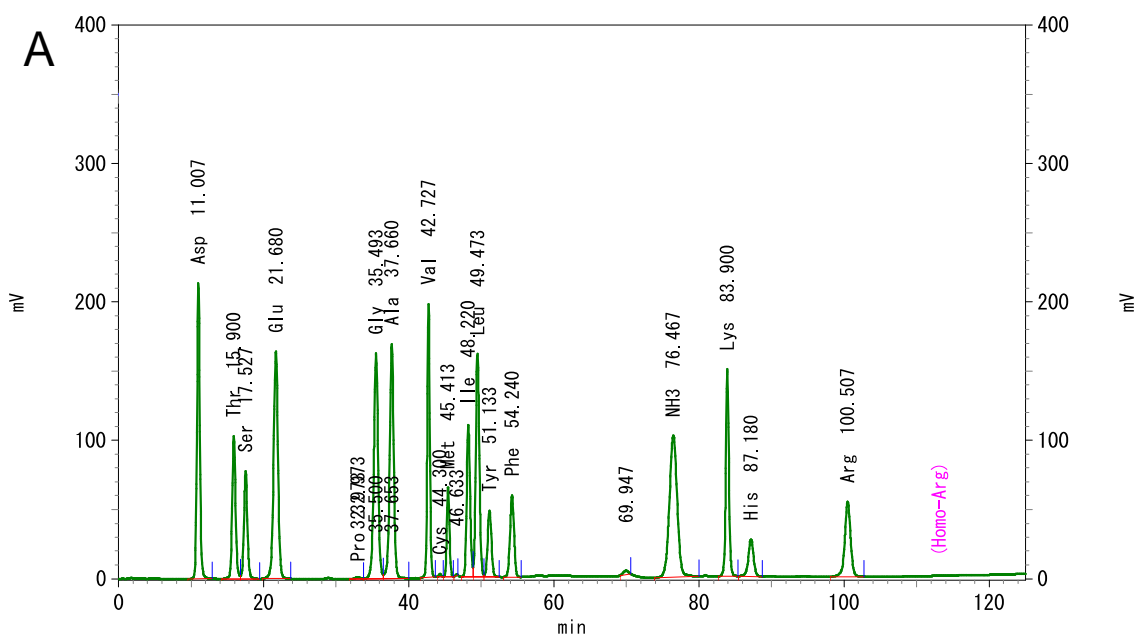

**B**

| No. | retention time (min) | component | peak height | peak area | concentration (nmol) | weight (ng) | resolution (JP) |
|-----|----------------------|-----------|-------------|-----------|----------------------|-------------|-----------------|
| 1   | 11.007               | Asp       | 853822      | 23856878  | 11.89                | 1582.621    | 0               |
| 2   | 15.9                 | Thr       | 411786      | 13358009  | 6.248                | 744.163     | 6.41            |
| 3   | 17.527               | Ser       | 311221      | 10217511  | 4.773                | 501.612     | 1.976           |
| 4   | 21.68                | Glu       | 656144      | 27902984  | 13.26                | 1950.496    | 4.338           |
| 6   | 35.493               | Gly       | 651343      | 27139868  | 12.114               | 909.435     | 2.283           |
| 7   | 37.66                | Ala       | 677610      | 26581433  | 11.926               | 1062.461    | 2.118           |
| 8   | 42.727               | Val       | 790939      | 19274966  | 8.805                | 1031.039    | 6.276           |
| 9   | 44.3                 | Cys       | 9236        | 200706    | 0.087                | 20.994      | 2.622           |
| 10  | 45.413               | Met       | 257727      | 6628928   | 2.968                | 442.786     | 1.783           |
| 12  | 48.22                | Ile       | 440001      | 14510555  | 6.71                 | 880.348     | 2.33            |
| 13  | 49.473               | Leu       | 644347      | 22166544  | 10.109               | 1326.315    | 1.419           |
| 14  | 51.133               | Tyr       | 190684      | 7068568   | 3.257                | 590.095     | 1.774           |
| 15  | 54.24                | Phe       | 236497      | 9019919   | 4.274                | 706.108     | 3.155           |
| 17  | 76.467               | NH3       | 409178      | 30626356  | 20.215               | 344.259     | 3.971           |
| 18  | 83.9                 | Lys       | 598351      | 17868480  | 7.555                | 1104.568    | 5.517           |
| 19  | 87.18                | His       | 106702      | 5300304   | 2.469                | 383.149     | 3.243           |
| 20  | 100.507              | Arg       | 215985      | 11945208  | 5.686                | 990.495     | 10.017          |
|     |                      | Homo-Arg  |             |           | 0.000BDL             | 0           |                 |

**Figure S8.** The quantitative analysis of the amino-acid composition of the soluble proteins from B-95.ΔA. (A) The profile of the chromatography separating the standard amino acids and L-homoarginine. Proline was not detected in this chromatography. (B) The list tabulates the data for each amino acid.

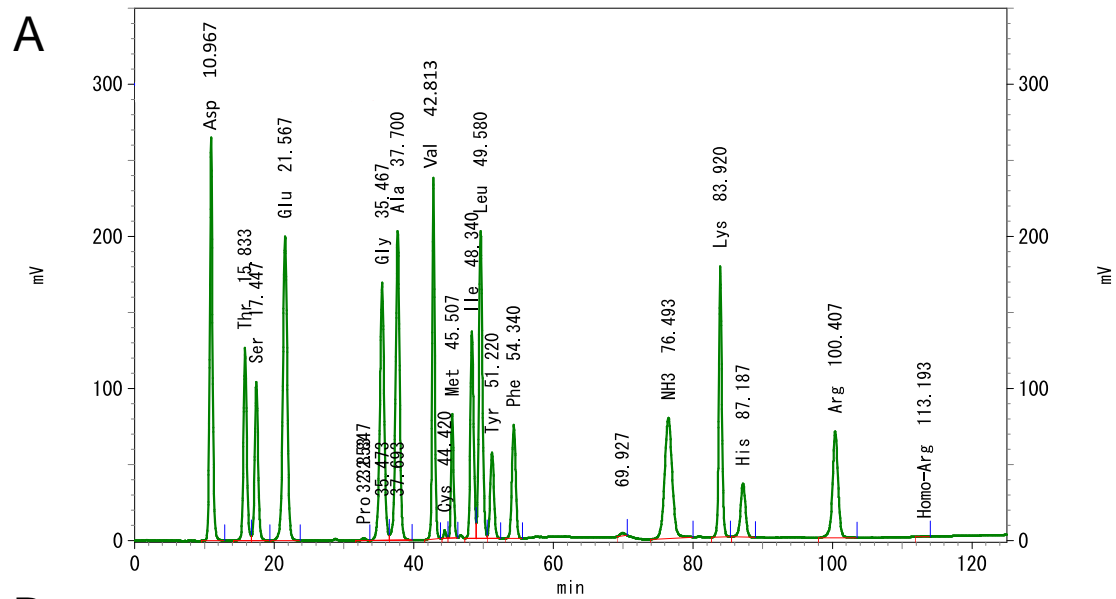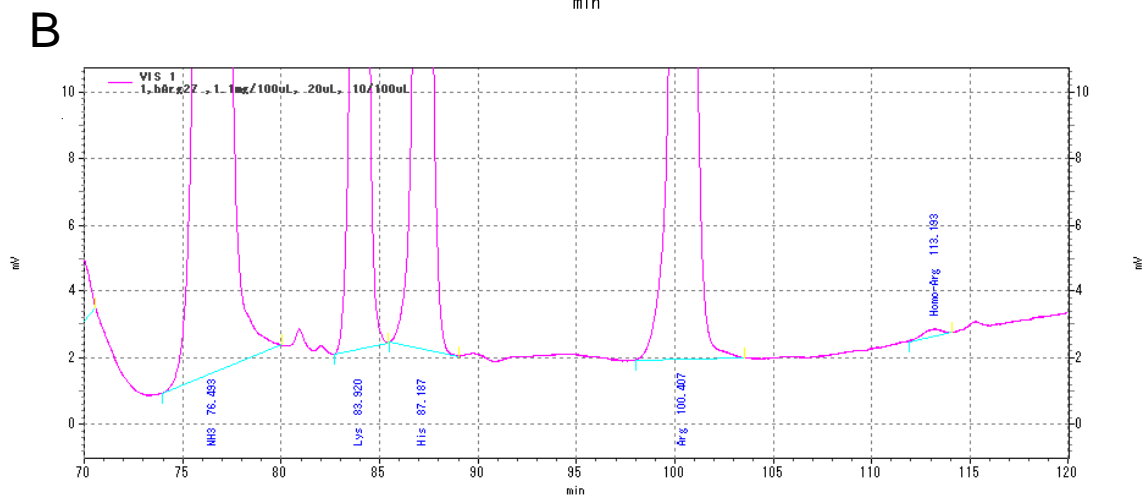

**C**

| No. | retention time (min) | component | peak height | peak area | concentration (nmol) | weight (ng) | resolution (JP) |
|-----|----------------------|-----------|-------------|-----------|----------------------|-------------|-----------------|
| 1   | 10.967               | Asp       | 1060901     | 30142802  | 15.048               | 2002.894    | 0               |
| 2   | 15.833               | Thr       | 507310      | 16757015  | 7.904                | 941.363     | 6.329           |
| 3   | 17.447               | Ser       | 418016      | 13975661  | 6.546                | 688.011     | 1.933           |
| 4   | 21.567               | Glu       | 800110      | 35144455  | 16.757               | 2464.89     | 4.203           |
| 6   | 35.467               | Gly       | 677960      | 29643444  | 13.204               | 991.208     | 2.324           |
| 7   | 37.7                 | Ala       | 813298      | 33065155  | 14.96                | 1332.773    | 2.095           |
| 8   | 42.813               | Val       | 950688      | 23747215  | 10.995               | 1287.536    | 6.189           |
| 9   | 44.42                | Cys       | 21709       | 476637    | 0.211                | 50.82       | 2.701           |
| 10  | 45.507               | Met       | 326700      | 8644403   | 3.801                | 567.124     | 1.742           |
| 11  | 48.34                | Ile       | 544391      | 18320364  | 8.621                | 1131.127    | 3.609           |
| 12  | 49.58                | Leu       | 808108      | 28444560  | 12.939               | 1697.6      | 1.374           |
| 13  | 51.22                | Tyr       | 226074      | 8436057   | 3.885                | 703.926     | 1.73            |
| 14  | 54.34                | Phe       | 298253      | 11313302  | 5.368                | 886.789     | 3.179           |
| 16  | 76.493               | NH3       | 316607      | 23903336  | 15.886               | 270.545     | 3.959           |
| 17  | 83.92                | Lys       | 713232      | 21534296  | 9.088                | 1328.639    | 5.487           |
| 18  | 87.187               | His       | 140924      | 7032191   | 3.249                | 504.252     | 3.217           |
| 19  | 100.407              | Arg       | 279171      | 15530771  | 7.392                | 1287.714    | 9.915           |
| 20  | 113.193              | Homo-Arg  | 851         | 59356     | 0.033                | 6.241       | 7.977           |

**Figure S9.** The quantitative analysis of the amino-acid composition of the soluble proteins from AGG-27.3/Har. (A) The profile of the chromatography separating the standard amino acids and L-homoarginine. Proline was not detected in this chromatography. (B) A magnified area encompassing the L-homoarginine peak at 113 min. (C) The list tabulates the data for each amino acid.

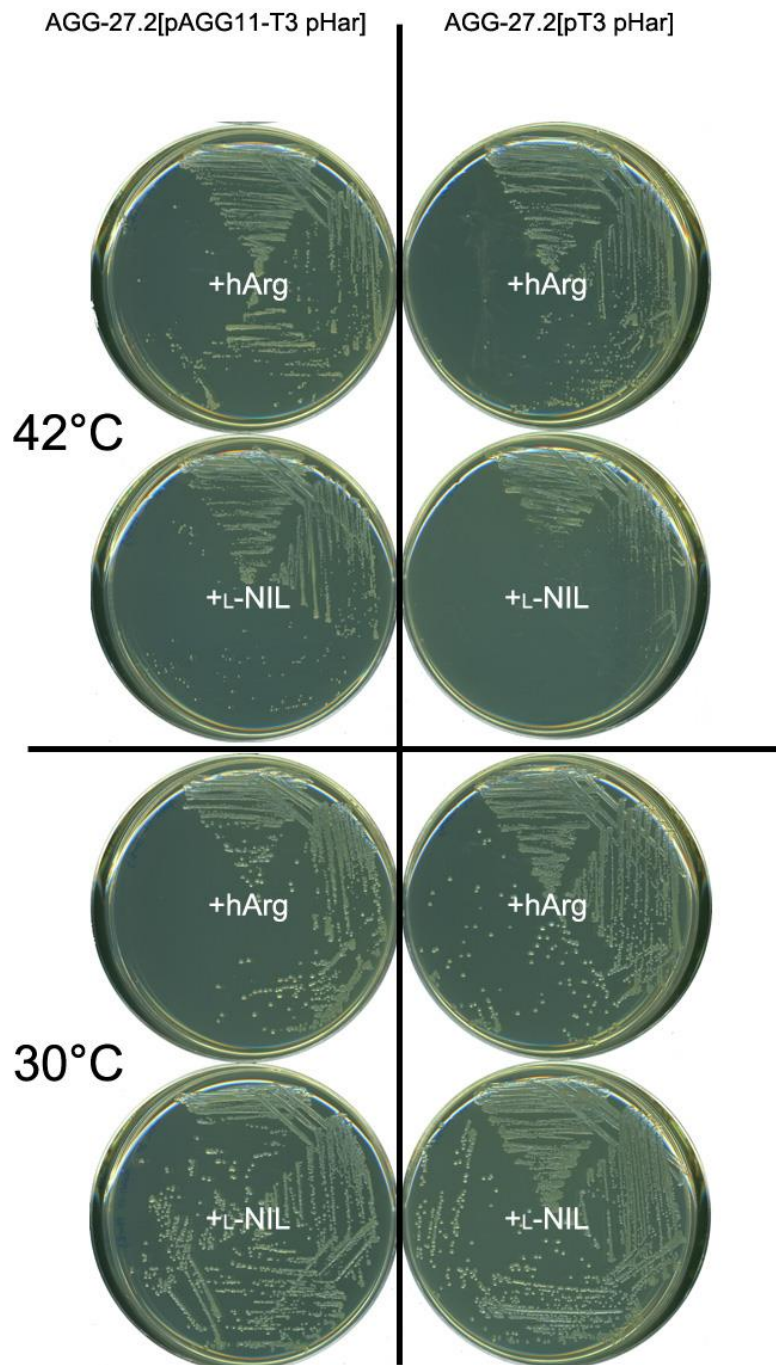

**Figure S10.** The temperature-sensitivity examined for the AGG-27.2[pAGG11-T3 pHar] and AGG-27.2[pT3 pHar] cells in the presence of L-homoarginine (hArg) and L-NIL in the growth media. The cells were incubated on LB agar plates containing the designated amino acids for 2 days at 30°C and 42°C.

**Table S1.** The base sequences of the tRNA<sup>T4</sup><sub>UCU</sub> gene including the indicated promoters and the *rrnC* terminator.

*PtyrT*-core-tRNA<sup>T4</sup><sub>UCU</sub>-*TrrnC* (T1):

TTCTCAACGTAACACTTTACAGCGGCGCGTCATTTGATATGATGCGCCCCGCTTCCCGAT  
AAGGGAGCAGGCCAGTAAAAAGGATCCATCAGACGCATTACGTCCCGCTGGTGTAATG  
GATAGCATAACGAAGCTTCTAACTTTGCGGTCCTGGTTCGATCCCAGGGCGGGATACCAA  
ATTTATCACAGATTGAAAATTTTTGATCCTTAGCGAAAGCTAAGGATTTTTTTTTATCGCG  
ACGCGAGGCTGGATGGCCTTCCCCATTATGATTCTTCTCGCTTCCGGCGGCATCGGGAT  
GCCCGCGTTGCAGGCCATGCTGTCCAGGCAGGTAGATGACGACCATCAGGGACAGCT

*PselC*-tRNA<sup>T4</sup><sub>UCU</sub>-*TrrnC* (T2):

GCGAATATTCCGATATCTGGTTATTAATTTATGATTCTTGTTTTATGTGATCGTGGTAGC  
GTAAATCCGCTCATATATCATTGTAATAATATGGGTTTTATATGAACTATAATGCTTTTCG  
TGATAATACGCTGCGTGTATTAGGCGGAAAAAACTGATCTGGGGGATGTAGAAACTCA  
AGGAAGTAGCTATAATGCGCCCCGCTTCCCGATAAGGGAGCAGGCCAGTAAAAAGGAT  
CCATCAGACGCATTACGTCCCGCTGGTGTAATGGATAGCATAACGAAGCTTCTAACTTTG  
CGGTCCTGGTTCGATCCCAGGGCGGGATACCAAATTTATCACAGATTGAAAATTTTTGA  
TCCTTAGCGAAAGCTAAGGATTTTTTTTTATCGCGACGCGAGGCTGGATGGCCTTCCCCA  
TTATGATTCTTCTCGCTTCCGGCGGCATCGGGATGCCCGCGTTGCAGGCCATGCTGTCCA  
GGCAGGTAGATGACGACCATCAGGGACAGCT

*PselC*-core-tRNA<sup>T4</sup><sub>UCU</sub>-*TrrnC* (T3):

GATCTGGGGGATGTAGAAACTCAAGGAAGTAGCTATAATGCGCCCCGCTTCCCGATAA  
GGGAGCAGGCCAGTAAAAAGGATCCATCAGACGCATTACGTCCCGCTGGTGTAATGGA  
TAGCATAACGAAGCTTCTAACTTTGCGGTCCTGGTTCGATCCCAGGGCGGGATACCAAAT  
TTATCACAGATTGAAAATTTTTGATCCTTAGCGAAAGCTAAGGATTTTTTTTTATCGCGAC  
GCGAGGCTGGATGGCCTTCCCCATTATGATTCTTCTCGCTTCCGGCGGCATCGGGATGC  
CCGCGTTGCAGGCCATGCTGTCCAGGCAGGTAGATGACGACCATCAGGGACAGCT

**Table S2.** The oligonucleotides used for genome engineering. The lowercase letters represent the phosphorothioate parts within the oligonucleotides.

|                          |                                                                                  |
|--------------------------|----------------------------------------------------------------------------------|
| <i>pheT</i>              | ttcaGCTTTTGTAAAGCGCCATAGGTTCAATCCCTTAGTCTCGCAATGATGCCTGGA<br>ATCGCTCTTTTAATGCCTC |
| <i>dnaC</i>              | gccgATATTATGTCGGCGATGAAAGATACCTTCCGCAATAGCGGTACCAGCGAAG<br>AACAACTGCTTAACGATCTG  |
| <i>yejM</i>              | cccgCTGACCTTATCGTCGGCTCCCAGCGCCTGATGCGCTTTTTGTCCGTCATTCT<br>GGCAACGGCGGGAATGAC   |
| <i>lexA</i>              | tgatCACGGATGAGATCAAACACCTCTTGCTGTCTCGCAGTCAACGCTTTCATTCC<br>GCCCCCTGGGTGTATATAC  |
| <i>coaE</i>              | tttgATAATCATGATGAATTCCCGGGAATATAAATTATGCGCTATATAGTTGCCTT<br>AACGGGAGGCATTGGCAGT  |
| <i>trmD</i><br>(for AGA) | ttcaGCTTTTGTAAAGCGCCATAGGTTCAATCCCTTAGTCTCGCAATGATGCCTGGA<br>ATCGCTCTTTTAATGCCTC |
| <i>trmD</i>              | ttgcTGTGTGCGTGTTCGGTTTTGAACTCCGCCAAAAGTCGGGCTTGCTCTTCAGT<br>CAGAGCCAGGTTTTCCAG   |
| <i>hemG</i>              | aggtAGGAGGCAATCTCGCGCGTTTTGTCCGTCCCGAGTACTAAAAAGAATTAATG<br>TTTTACGTATTACTCCATC  |
| <i>ribF</i>              | gctgATGAAATTTTGC GCGGTTAACGCCGCAAAGCGACGATCAAACGCACGCAC<br>AGCACGTAATCAACGCCACA  |
| <i>asd</i>               | catcAGGCTTACGGTACAGTTACCGCCAACAAAAGTCTTCACGCCATTATTTAATC<br>CGTCGGTAATGACGTCCTG  |
| <i>lpxC</i>              | accgACACCCGTCGCTGAACGATACGTTTCAAAGTACGCTGCTTGATCATCGTAT<br>TATCTCGCAAATTACCTA    |
| <i>folC</i>              | actaACCGATTCTGAACTTACTTGCCACTTAACCTCCTGAGCGACGCGCTCAAT<br>CACTTCCATGACATGTGCG    |
| <i>secE</i>              | ggcgTTTTTAGGAGCTTCAGACATCTCAGAACCTCAAACCGCAGGCCAGTGATA<br>AAGGATACCAGGCGAACCCAG  |
| <i>dnaT</i><br>(for AGA) | gcgaACCTGACAGCCAAATTCCACCAGGATTCCGTGGTTAAGAGGGTAACGATGA<br>AAAACGTTGGCGACCTGATG  |
| <i>holB</i><br>(for AGA) | ttttCGAAATCAGGTCGTAACCATGGATACCATCGCATTAATCCAACCTCCTTACC<br>CAGTGGGTCACGGTAGTGC  |
| <i>yceQ</i>              | tggaATAATGAGGCCGTTTCCGTGTCCATTCGAGTAAGGACTAAAAATTTTACGG<br>AATAACCCATTTTGCCCGAC  |
| <i>ftsI</i>              | gttaCCATTAGCCCGTAGCCGAAAGAGAAAGTCGCACGTTCAATGTCAGACCACC<br>GTTGTTTTTGAGGATATAAG  |

|                             |                                                                                  |
|-----------------------------|----------------------------------------------------------------------------------|
| <i>lptC</i><br>(for AGA)    | cagcAAGAACGCCGAGCTGATTGAAAAGGTACGGACCAGTTATGAAATTCAAAA<br>CAAACAAACTCAGCCTTAATC  |
| <i>ftsL</i>                 | atcaACATGCTGCATTTGCAGCTTTTCCGTCGCAATACGCTCAACCCGGCTATGGT<br>CGCCGAGCGCATTCCTCTTC |
| <i>dnaG</i>                 | gcagGCAGCGGCCCCAGCCAGATCGAGCGCCACCAACGTCAGACCCTTTATCAGT<br>TGATGGACGGTCTGAATACG  |
| <i>minE</i><br>(for repair) | caaaTTGATCCTGAGATGGTAACCGTACAATTGGAACAGAAAGATGGCGATATTT<br>CTATTCTTGAGCTGAACGTG  |
| <i>cca</i><br>(for AGA)     | tctgCGCGTGCCAAATGAAATTCGCGATTTAGCGCGCTTAGTGGCTGAGTTTCACG<br>ATCTCATCCACACCTTCCC  |
| <i>lptF</i>                 | agatTCGCCGGAATATCGCCGTCAACCGCTGCCCCAGAATACGCACTAACTTTTG<br>ACAGAAGAAGATCAAAAGC   |
| <i>ftsB</i>                 | caccAGACGATAAAAAGTTTCGCCCGGCCGGGTCATCGACAGTTCATTACGCGCA<br>CGCTCTTCGAGCGCCTCCTG  |
| <i>glyQ</i>                 | taatCCTGTAAGGTCAGGATCAAGCCCTGGAACGTACGCGTATCAAACTTTTGCAT<br>ATTATTTTCGTGCTGGATAC |

**Table S3.** The primer pairs used for colony-direct PCR. The numbers after the gene names indicate the expected lengths (bp) of the PCR products.

| Gene, size(bp)                   | Forward primer               | Reverse primer           |
|----------------------------------|------------------------------|--------------------------|
| <i>pheT</i> , 410                | GGTTGTTTCATCCTGAACTGG        | GGTTCAATCCCTTAGTCTCG     |
| <i>dnaC</i> , 290                | GATGAAAGATACCTTCCGC          | CTACGGTAGCTATCCCAGTTG    |
| <i>yejM</i> , 300                | AAGCGCACTAAGGGAAACAG         | AATGACGGACAAAAAGCG       |
| <i>lexA</i> , 400                | CGTAGCGGTATTGTTGGCG          | TCTTGCTGTCTCGCAGTC       |
| <i>coaE</i> , 259                | CGGGAATATAAATTATGCGC         | TTTTTCTCTCCGGGTTGGCG     |
| <i>trmD</i><br>(for AGA), 350    | AATTGATTCTGGTGTGCGGTC        | AGAAGTTCAGGACGACGC       |
| <i>trmD</i> , 400                | AATTGATTCTGGTGTGCGGTC        | TTGAACTCCGCCAAAAG        |
| <i>hemG</i> , 200                | CGTGAAAACATTAATTCTTTTAGTACTC | GGAACGCTGAATGGTAGTGAC    |
| <i>ribF</i> , 200                | CGTTTTGATCGTCGCTTT           | CCTTCGCAAAAAGTTTGCCTAC   |
| <i>asd</i> , 400                 | AAAACGCTTATGAAAAATGTTGG      | CCGCCAACAAAAGTCTTC       |
| <i>lpxC</i> , 600                | GATCAAGCAGCGTACTTTG          | GATATTCGATATCACGCATGAAAC |
| <i>folC</i> , 500                | CGTCGCTCAGGAGGTTAAG          | TCACTTTATCGGCATTTTTTCAG  |
| <i>secE</i> , 300                | CAACTACCTTTATCGCGACATTATG    | ATCTCAGAACCTCAAACCG      |
| <i>dnaT</i> , 506                | CCTGGTACACGATCACCAAAC        | CGTTACCCTCTTAACCACG      |
| <i>holB</i> , 200                | TGAAGGAGTTGGATTAATGC         | AGTGACCGCAACTTTTGTGAC    |
| <i>yceQ</i> , 259                | CAACCTCACGGTTATCGTCAG        | CGTGTCCATTTCGAGTAAGG     |
| <i>ftsI</i> , 400                | TGACATTGAACGTGCGACT          | GTAGTATTTACCCGCCTGCG     |
| <i>lptC</i> , 400                | TTGAAAAGGTACGGACCAG          | CATTACCCGTCAGAACGAC      |
| <i>ftsL</i> , 300                | GTGACAGAAGCTCTAAGCAAAG       | TTCCGTCGCAATACGCTCA      |
| <i>dnaG</i> , 326                | CATTAATGATCTGCTGGCAC         | GATAAAGGGTCTGACGTTGG     |
| <i>minE</i><br>(for repair), 200 | GTAACCGTACAATTGGAACAG        | GCAATGAGGAGTATCAGCAAG    |
| <i>cca</i><br>(for AGA), 300     | AAATTCGCGATTTAGCGC           | TCAGCTCCTCGGAATCTC       |
| <i>lptF</i> , 497                | GTTAGTGCGTATTCTGGGG          | GTAAATGTCCGGAATCGG       |
| <i>ftsB</i> , 242                | CGCGTAATGAACTGTCG            | CGAGTGTCAAGAATGGTTG      |
| <i>glyQ</i> , 510                | atATGCAAAAGTTTGATACGC        | GACGTTCCAGACCGTAGGTG     |



**Table S4.** Numbers of AGA and AGG codons included in the essential open reading frames (ORFs) of the *E. coli* K-12, BL21(DE3), and AGG-27.1 strains.

| name        | K-12 |     | BL21(DE3) |     | AGG-27.1 |     |
|-------------|------|-----|-----------|-----|----------|-----|
|             | AGA  | AGG | AGA       | AGG | AGA      | AGG |
| <i>ileS</i> | 0    | 0   | 0         | 0   | 0        | 0   |
| <i>lspA</i> | 1    | 0   | 0         | 0   | 0        | 0   |
| <i>ispH</i> | 0    | 0   | 0         | 0   | 0        | 0   |
| <i>dapB</i> | 2    | 0   | 2         | 0   | 2        | 0   |
| <i>folA</i> | 0    | 0   | 0         | 0   | 0        | 0   |
| <i>imp</i>  | 2    | 0   | 2         | 0   | 2        | 0   |
| <i>murE</i> | 0    | 0   | 0         | 0   | 0        | 0   |
| <i>murF</i> | 0    | 0   | 0         | 0   | 0        | 0   |
| <i>mraY</i> | 0    | 0   | 0         | 0   | 0        | 0   |
| <i>murD</i> | 0    | 0   | 0         | 0   | 0        | 0   |
| <i>ftsW</i> | 0    | 0   | 0         | 0   | 0        | 0   |
| <i>murG</i> | 0    | 0   | 0         | 0   | 0        | 0   |
| <i>murC</i> | 0    | 0   | 0         | 0   | 0        | 0   |
| <i>ftsQ</i> | 2    | 0   | 2         | 0   | 2        | 0   |
| <i>ftsA</i> | 1    | 0   | 1         | 0   | 1        | 0   |
| <i>ftsZ</i> | 0    | 0   | 0         | 0   | 0        | 0   |
| <i>yacA</i> | 0    | 0   | 0         | 0   | 0        | 0   |
| <i>secA</i> | 0    | 0   | 0         | 0   | 0        | 0   |
| <i>yadF</i> | 0    | 0   | 0         | 0   | 0        | 0   |
| <i>folK</i> | 1    | 0   | 1         | 0   | 1        | 0   |
| <i>hemL</i> | 0    | 0   | 0         | 0   | 0        | 0   |
| <i>yadR</i> | 0    | 0   | 0         | 0   | 0        | 0   |

|             |   |   |   |   |   |   |
|-------------|---|---|---|---|---|---|
| <i>dapD</i> | 0 | 0 | 0 | 0 | 0 | 0 |
| <i>map</i>  | 0 | 0 | 0 | 0 | 0 | 0 |
| <i>rpsB</i> | 0 | 0 | 0 | 0 | 0 | 0 |
| <i>tsf</i>  | 0 | 0 | 0 | 0 | 0 | 0 |
| <i>pyrH</i> | 0 | 0 | 0 | 0 | 0 | 0 |
| <i>frr</i>  | 1 | 0 | 1 | 0 | 1 | 0 |
| <i>dxr</i>  | 1 | 0 | 1 | 0 | 1 | 0 |
| <i>yaeT</i> | 0 | 0 | 0 | 0 | 0 | 0 |
| <i>lpxD</i> | 0 | 0 | 0 | 0 | 0 | 0 |
| <i>fabZ</i> | 0 | 0 | 0 | 0 | 0 | 0 |
| <i>lpxA</i> | 0 | 0 | 0 | 0 | 0 | 0 |
| <i>lpxB</i> | 2 | 0 | 2 | 0 | 2 | 0 |
| <i>accA</i> | 0 | 0 | 0 | 0 | 0 | 0 |
| <i>secD</i> | 0 | 0 | 0 | 0 | 0 | 0 |
| <i>secF</i> | 0 | 0 | 0 | 0 | 0 | 0 |
| <i>ribD</i> | 0 | 0 | 0 | 0 | 0 | 0 |
| <i>ribE</i> | 0 | 0 | 0 | 0 | 0 | 0 |
| <i>nusB</i> | 0 | 0 | 0 | 0 | 0 | 0 |
| <i>thiL</i> | 1 | 0 | 1 | 0 | 1 | 0 |
| <i>dxs</i>  | 0 | 0 | 0 | 0 | 0 | 0 |
| <i>ispA</i> | 1 | 0 | 1 | 0 | 1 | 0 |
| <i>dnaX</i> | 1 | 0 | 1 | 0 | 1 | 0 |
| <i>adk</i>  | 0 | 0 | 0 | 0 | 0 | 0 |
| <i>hemH</i> | 1 | 0 | 1 | 0 | 1 | 0 |
| <i>lpxH</i> | 0 | 0 | 0 | 0 | 0 | 0 |
| <i>cysS</i> | 0 | 0 | 0 | 0 | 0 | 0 |
| <i>folD</i> | 0 | 0 | 0 | 0 | 0 | 0 |
| <i>mrDA</i> | 1 | 0 | 1 | 0 | 1 | 0 |

|             |   |   |   |   |   |   |
|-------------|---|---|---|---|---|---|
| <i>nadD</i> | 0 | 0 | 0 | 0 | 0 | 0 |
| <i>holA</i> | 0 | 0 | 0 | 0 | 0 | 0 |
| <i>rlpB</i> | 0 | 0 | 0 | 0 | 0 | 0 |
| <i>leuS</i> | 0 | 0 | 0 | 0 | 0 | 0 |
| <i>lnt</i>  | 0 | 0 | 0 | 0 | 0 | 0 |
| <i>glnS</i> | 0 | 0 | 0 | 0 | 0 | 0 |
| <i>fldA</i> | 0 | 0 | 0 | 0 | 0 | 0 |
| <i>infA</i> | 0 | 0 | 0 | 0 | 0 | 0 |
| <i>ftsK</i> | 0 | 0 | 0 | 0 | 0 | 0 |
| <i>lolA</i> | 0 | 0 | 0 | 0 | 0 | 0 |
| <i>serS</i> | 0 | 0 | 0 | 0 | 0 | 0 |
| <i>rpsA</i> | 0 | 0 | 0 | 0 | 0 | 0 |
| <i>msbA</i> | 0 | 0 | 0 | 0 | 0 | 0 |
| <i>lpxK</i> | 0 | 0 | 0 | 0 | 0 | 0 |
| <i>kdsB</i> | 0 | 0 | 0 | 0 | 0 | 0 |
| <i>mukF</i> | 2 | 0 | 2 | 0 | 2 | 0 |
| <i>mukE</i> | 0 | 0 | 0 | 0 | 0 | 0 |
| <i>mukB</i> | 0 | 0 | 0 | 0 | 0 | 0 |
| <i>fabA</i> | 0 | 0 | 0 | 0 | 0 | 0 |
| <i>mviN</i> | 1 | 0 | 1 | 0 | 1 | 0 |
| <i>rne</i>  | 1 | 0 | 1 | 0 | 1 | 0 |
| <i>fabD</i> | 0 | 0 | 0 | 0 | 0 | 0 |
| <i>fabG</i> | 0 | 0 | 0 | 0 | 0 | 0 |
| <i>acpP</i> | 0 | 0 | 0 | 0 | 0 | 0 |
| <i>tmk</i>  | 1 | 0 | 1 | 0 | 1 | 0 |
| <i>holB</i> | 2 | 0 | 2 | 0 | 1 | 0 |
| <i>lolC</i> | 0 | 0 | 0 | 0 | 0 | 0 |
| <i>lolD</i> | 0 | 0 | 0 | 0 | 0 | 0 |

|             |   |   |   |   |   |   |
|-------------|---|---|---|---|---|---|
| <i>lolE</i> | 1 | 0 | 1 | 0 | 1 | 0 |
| <i>ycfB</i> | 0 | 0 | 0 | 0 | 0 | 0 |
| <i>pth</i>  | 0 | 0 | 0 | 0 | 0 | 0 |
| <i>prsA</i> | 0 | 0 | 0 | 0 | 0 | 0 |
| <i>lolB</i> | 0 | 0 | 0 | 0 | 0 | 0 |
| <i>hemA</i> | 0 | 0 | 0 | 0 | 0 | 0 |
| <i>prfA</i> | 0 | 0 | 0 | 0 | 0 | 0 |
| <i>hemK</i> | 1 | 0 | 0 | 0 | 0 | 0 |
| <i>kdsA</i> | 0 | 0 | 0 | 0 | 0 | 0 |
| <i>topA</i> | 0 | 0 | 0 | 0 | 0 | 0 |
| <i>ribA</i> | 0 | 0 | 0 | 0 | 0 | 0 |
| <i>fabI</i> | 0 | 0 | 0 | 0 | 0 | 0 |
| <i>tyrS</i> | 0 | 0 | 0 | 0 | 0 | 0 |
| <i>ribC</i> | 0 | 0 | 0 | 0 | 0 | 0 |
| <i>pheS</i> | 0 | 0 | 0 | 0 | 0 | 0 |
| <i>rplT</i> | 0 | 0 | 0 | 0 | 0 | 0 |
| <i>infC</i> | 1 | 0 | 1 | 0 | 1 | 0 |
| <i>thrS</i> | 1 | 0 | 1 | 0 | 1 | 0 |
| <i>nadE</i> | 1 | 0 | 1 | 0 | 1 | 0 |
| <i>gapA</i> | 0 | 0 | 0 | 0 | 0 | 0 |
| <i>yeaZ</i> | 0 | 0 | 0 | 0 | 0 | 0 |
| <i>aspS</i> | 0 | 0 | 0 | 0 | 0 | 0 |
| <i>argS</i> | 0 | 0 | 0 | 0 | 0 | 0 |
| <i>pgsA</i> | 0 | 0 | 0 | 0 | 0 | 0 |
| <i>folE</i> | 0 | 0 | 0 | 0 | 0 | 0 |
| <i>gyrA</i> | 1 | 0 | 1 | 0 | 1 | 0 |
| <i>nrdA</i> | 0 | 0 | 0 | 0 | 0 | 0 |
| <i>nrdB</i> | 0 | 0 | 0 | 0 | 0 | 0 |

|             |   |   |   |   |   |   |
|-------------|---|---|---|---|---|---|
| <i>accD</i> | 0 | 0 | 0 | 0 | 0 | 0 |
| <i>fabB</i> | 0 | 0 | 0 | 0 | 0 | 0 |
| <i>glhX</i> | 0 | 0 | 0 | 0 | 0 | 0 |
| <i>zipA</i> | 0 | 0 | 0 | 0 | 0 | 0 |
| <i>dapE</i> | 0 | 0 | 0 | 0 | 0 | 0 |
| <i>dapA</i> | 1 | 0 | 1 | 0 | 1 | 0 |
| <i>hda</i>  | 1 | 0 | 1 | 0 | 1 | 0 |
| <i>der</i>  | 0 | 0 | 0 | 0 | 0 | 0 |
| <i>hisS</i> | 0 | 0 | 0 | 0 | 0 | 0 |
| <i>ispG</i> | 1 | 0 | 1 | 0 | 1 | 0 |
| <i>suhB</i> | 0 | 0 | 0 | 0 | 0 | 0 |
| <i>acpS</i> | 0 | 0 | 0 | 0 | 0 | 0 |
| <i>era</i>  | 0 | 0 | 0 | 0 | 0 | 0 |
| <i>lepB</i> | 0 | 0 | 0 | 0 | 0 | 0 |
| <i>yfiO</i> | 1 | 0 | 1 | 0 | 1 | 0 |
| <i>rplS</i> | 0 | 0 | 0 | 0 | 0 | 0 |
| <i>yjfA</i> | 1 | 0 | 1 | 0 | 1 | 0 |
| <i>rpsP</i> | 0 | 0 | 0 | 0 | 0 | 0 |
| <i>ffh</i>  | 1 | 0 | 1 | 0 | 1 | 0 |
| <i>grpE</i> | 0 | 0 | 0 | 0 | 0 | 0 |
| <i>yjfB</i> | 0 | 0 | 0 | 0 | 0 | 0 |
| <i>csrA</i> | 0 | 0 | 0 | 0 | 0 | 0 |
| <i>alaS</i> | 0 | 0 | 0 | 0 | 0 | 0 |
| <i>ispF</i> | 0 | 0 | 0 | 0 | 0 | 0 |
| <i>ispD</i> | 0 | 0 | 0 | 0 | 0 | 0 |
| <i>eno</i>  | 0 | 0 | 0 | 0 | 0 | 0 |
| <i>pyrG</i> | 0 | 0 | 0 | 0 | 0 | 0 |
| <i>lgt</i>  | 0 | 0 | 0 | 0 | 0 | 0 |

|             |   |   |   |   |   |   |
|-------------|---|---|---|---|---|---|
| <i>fbaA</i> | 0 | 0 | 0 | 0 | 0 | 0 |
| <i>pgk</i>  | 0 | 0 | 0 | 0 | 0 | 0 |
| <i>metK</i> | 0 | 0 | 0 | 0 | 0 | 0 |
| <i>yqgF</i> | 1 | 0 | 1 | 0 | 1 | 0 |
| <i>plsC</i> | 1 | 0 | 1 | 0 | 1 | 0 |
| <i>parC</i> | 0 | 0 | 0 | 0 | 0 | 0 |
| <i>parE</i> | 0 | 0 | 0 | 0 | 0 | 0 |
| <i>ribB</i> | 0 | 0 | 0 | 0 | 0 | 0 |
| <i>cca</i>  | 3 | 0 | 3 | 0 | 2 | 0 |
| <i>ygiG</i> | 0 | 0 | 0 | 0 | 0 | 0 |
| <i>ygiD</i> | 0 | 0 | 0 | 0 | 0 | 0 |
| <i>rpoD</i> | 0 | 0 | 0 | 0 | 0 | 0 |
| <i>infB</i> | 0 | 0 | 0 | 0 | 0 | 0 |
| <i>nusA</i> | 0 | 0 | 0 | 0 | 0 | 0 |
| <i>mrsA</i> | 0 | 0 | 0 | 0 | 0 | 0 |
| <i>ftsH</i> | 0 | 0 | 0 | 0 | 0 | 0 |
| <i>obgE</i> | 0 | 0 | 0 | 0 | 0 | 0 |
| <i>rpmA</i> | 0 | 0 | 0 | 0 | 0 | 0 |
| <i>rplU</i> | 0 | 0 | 0 | 0 | 0 | 0 |
| <i>murA</i> | 0 | 0 | 0 | 0 | 0 | 0 |
| <i>yrbI</i> | 0 | 0 | 0 | 0 | 0 | 0 |
| <i>lptC</i> | 3 | 0 | 3 | 0 | 2 | 0 |
| <i>yhbN</i> | 0 | 0 | 0 | 0 | 0 | 0 |
| <i>yhbG</i> | 1 | 0 | 1 | 0 | 1 | 0 |
| <i>rpsI</i> | 0 | 0 | 0 | 0 | 0 | 0 |
| <i>rplM</i> | 0 | 0 | 0 | 0 | 0 | 0 |
| <i>degS</i> | 0 | 0 | 0 | 0 | 0 | 0 |
| <i>mreD</i> | 1 | 0 | 1 | 0 | 1 | 0 |

|             |   |   |   |   |   |   |
|-------------|---|---|---|---|---|---|
| <i>mreB</i> | 0 | 0 | 0 | 0 | 0 | 0 |
| <i>accB</i> | 0 | 0 | 0 | 0 | 0 | 0 |
| <i>accC</i> | 0 | 0 | 0 | 0 | 0 | 0 |
| <i>yrdC</i> | 1 | 0 | 1 | 0 | 1 | 0 |
| <i>def</i>  | 0 | 0 | 0 | 0 | 0 | 0 |
| <i>fmt</i>  | 0 | 0 | 0 | 0 | 0 | 0 |
| <i>rplQ</i> | 0 | 0 | 0 | 0 | 0 | 0 |
| <i>rpoA</i> | 1 | 0 | 1 | 0 | 1 | 0 |
| <i>rpsD</i> | 1 | 0 | 1 | 0 | 1 | 0 |
| <i>rpsK</i> | 1 | 0 | 1 | 0 | 1 | 0 |
| <i>rpsM</i> | 0 | 0 | 0 | 0 | 0 | 0 |
| <i>secY</i> | 1 | 0 | 1 | 0 | 1 | 0 |
| <i>rplO</i> | 0 | 0 | 0 | 0 | 0 | 0 |
| <i>rpmD</i> | 0 | 0 | 0 | 0 | 0 | 0 |
| <i>rpsE</i> | 0 | 0 | 0 | 0 | 0 | 0 |
| <i>rplR</i> | 0 | 0 | 0 | 0 | 0 | 0 |
| <i>rplF</i> | 0 | 0 | 0 | 0 | 0 | 0 |
| <i>rpsH</i> | 0 | 0 | 0 | 0 | 0 | 0 |
| <i>rpsN</i> | 0 | 0 | 0 | 0 | 0 | 0 |
| <i>rplE</i> | 0 | 0 | 0 | 0 | 0 | 0 |
| <i>rplX</i> | 1 | 0 | 1 | 0 | 1 | 0 |
| <i>rplN</i> | 0 | 0 | 0 | 0 | 0 | 0 |
| <i>rpsQ</i> | 0 | 0 | 0 | 0 | 0 | 0 |
| <i>rpmC</i> | 0 | 0 | 0 | 0 | 0 | 0 |
| <i>rplP</i> | 0 | 0 | 0 | 0 | 0 | 0 |
| <i>rpsC</i> | 0 | 0 | 0 | 0 | 0 | 0 |
| <i>rplV</i> | 0 | 0 | 0 | 0 | 0 | 0 |
| <i>rpsS</i> | 0 | 0 | 0 | 0 | 0 | 0 |

|             |   |   |   |   |   |   |
|-------------|---|---|---|---|---|---|
| <i>rplB</i> | 0 | 0 | 0 | 0 | 0 | 0 |
| <i>rplW</i> | 0 | 0 | 0 | 0 | 0 | 0 |
| <i>rplD</i> | 0 | 0 | 0 | 0 | 0 | 0 |
| <i>rplC</i> | 0 | 0 | 0 | 0 | 0 | 0 |
| <i>rpsJ</i> | 1 | 0 | 1 | 0 | 1 | 0 |
| <i>fusA</i> | 0 | 0 | 0 | 0 | 0 | 0 |
| <i>rpsG</i> | 0 | 0 | 0 | 0 | 0 | 0 |
| <i>rpsL</i> | 0 | 0 | 0 | 0 | 0 | 0 |
| <i>trpS</i> | 0 | 0 | 0 | 0 | 0 | 0 |
| <i>yrjF</i> | 1 | 0 | 1 | 0 | 1 | 0 |
| <i>rpoH</i> | 0 | 0 | 0 | 0 | 0 | 0 |
| <i>ftsX</i> | 0 | 0 | 0 | 0 | 0 | 0 |
| <i>ftsE</i> | 1 | 0 | 1 | 0 | 1 | 0 |
| <i>ftsY</i> | 0 | 0 | 0 | 0 | 0 | 0 |
| <i>glyS</i> | 0 | 0 | 0 | 0 | 0 | 0 |
| <i>gpsA</i> | 1 | 0 | 1 | 0 | 1 | 0 |
| <i>kdtA</i> | 0 | 0 | 0 | 0 | 0 | 0 |
| <i>coaD</i> | 0 | 0 | 0 | 0 | 0 | 0 |
| <i>rpmB</i> | 0 | 0 | 0 | 0 | 0 | 0 |
| <i>dfp</i>  | 0 | 0 | 0 | 0 | 0 | 0 |
| <i>dut</i>  | 0 | 0 | 0 | 0 | 0 | 0 |
| <i>gmk</i>  | 1 | 0 | 1 | 0 | 1 | 0 |
| <i>spoT</i> | 0 | 0 | 0 | 0 | 0 | 0 |
| <i>gyrB</i> | 0 | 0 | 0 | 0 | 0 | 0 |
| <i>dnaN</i> | 1 | 0 | 1 | 0 | 1 | 0 |
| <i>dnaA</i> | 1 | 0 | 1 | 0 | 1 | 0 |
| <i>rpmH</i> | 0 | 0 | 0 | 0 | 0 | 0 |
| <i>yidC</i> | 0 | 0 | 0 | 0 | 0 | 0 |

|              |   |   |   |   |   |   |
|--------------|---|---|---|---|---|---|
| <i>glmS</i>  | 0 | 0 | 0 | 0 | 0 | 0 |
| <i>glmU</i>  | 0 | 0 | 0 | 0 | 0 | 0 |
| <i>rho</i>   | 0 | 0 | 0 | 0 | 0 | 0 |
| <i>hemD</i>  | 0 | 0 | 0 | 0 | 0 | 0 |
| <i>hemC</i>  | 1 | 0 | 1 | 0 | 1 | 0 |
| <i>yihA</i>  | 0 | 0 | 0 | 0 | 0 | 0 |
| <i>ftsN</i>  | 1 | 0 | 1 | 0 | 1 | 0 |
| <i>priA</i>  | 0 | 0 | 0 | 0 | 0 | 0 |
| <i>murI</i>  | 2 | 0 | 1 | 0 | 1 | 0 |
| <i>murB</i>  | 1 | 0 | 1 | 0 | 1 | 0 |
| <i>birA</i>  | 0 | 0 | 0 | 0 | 0 | 0 |
| <i>coaA</i>  | 1 | 0 | 1 | 0 | 1 | 0 |
| <i>nusG</i>  | 0 | 0 | 0 | 0 | 0 | 0 |
| <i>rplJ</i>  | 0 | 0 | 0 | 0 | 0 | 0 |
| <i>rplL</i>  | 0 | 0 | 0 | 0 | 0 | 0 |
| <i>rpoB</i>  | 0 | 0 | 0 | 0 | 0 | 0 |
| <i>rpoC</i>  | 0 | 0 | 0 | 0 | 0 | 0 |
| <i>ubiA</i>  | 0 | 0 | 0 | 0 | 0 | 0 |
| <i>plsB</i>  | 1 | 0 | 0 | 0 | 0 | 0 |
| <i>dnaB</i>  | 0 | 0 | 0 | 0 | 0 | 0 |
| <i>ssb</i>   | 1 | 0 | 1 | 0 | 1 | 0 |
| <i>groES</i> | 0 | 0 | 0 | 0 | 0 | 0 |
| <i>groEL</i> | 0 | 0 | 0 | 0 | 0 | 0 |
| <i>efp</i>   | 0 | 0 | 0 | 0 | 0 | 0 |
| <i>psd</i>   | 0 | 0 | 0 | 0 | 0 | 0 |
| <i>yjeQ</i>  | 0 | 0 | 0 | 0 | 0 | 0 |
| <i>orn</i>   | 0 | 0 | 0 | 0 | 0 | 0 |
| <i>yjeE</i>  | 0 | 0 | 0 | 0 | 0 | 0 |

|             |   |   |   |   |   |   |
|-------------|---|---|---|---|---|---|
| <i>rpsR</i> | 0 | 0 | 0 | 0 | 0 | 0 |
| <i>ppa</i>  | 0 | 0 | 0 | 0 | 0 | 0 |
| <i>valS</i> | 0 | 0 | 0 | 0 | 0 | 0 |
| <i>yjgQ</i> | 1 | 0 | 1 | 0 | 1 | 0 |
| <i>dnaT</i> | 3 | 0 | 3 | 0 | 2 | 0 |
| <i>ribF</i> | 1 | 1 | 0 | 1 | 0 | 0 |
| <i>ftsL</i> | 1 | 1 | 1 | 1 | 1 | 0 |
| <i>ftsI</i> | 1 | 1 | 1 | 1 | 1 | 0 |
| <i>lpxC</i> | 0 | 1 | 0 | 1 | 0 | 0 |
| <i>coaE</i> | 0 | 1 | 0 | 1 | 0 | 0 |
| <i>cdsA</i> | 0 | 1 | 0 | 1 | 0 | 1 |
| <i>tilS</i> | 1 | 1 | 1 | 0 | 1 | 0 |
| <i>proS</i> | 0 | 1 | 0 | 0 | 0 | 0 |
| <i>hemB</i> | 0 | 0 | 0 | 0 | 0 | 0 |
| <i>mrdB</i> | 1 | 1 | 1 | 1 | 1 | 0 |
| <i>asnS</i> | 0 | 1 | 0 | 1 | 0 | 0 |
| <i>ispE</i> | 2 | 1 | 2 | 1 | 2 | 0 |
| <i>pheT</i> | 0 | 1 | 0 | 1 | 0 | 0 |
| <i>metG</i> | 0 | 1 | 0 | 0 | 0 | 0 |
| <i>folC</i> | 1 | 1 | 1 | 1 | 0 | 0 |
| <i>ligA</i> | 0 | 1 | 0 | 1 | 0 | 0 |
| <i>pssA</i> | 0 | 1 | 0 | 1 | 0 | 0 |
| <i>trmD</i> | 2 | 1 | 2 | 1 | 0 | 0 |
| <i>ftsB</i> | 0 | 1 | 0 | 1 | 0 | 0 |
| <i>dnaG</i> | 1 | 1 | 1 | 1 | 1 | 0 |
| <i>ispB</i> | 0 | 1 | 0 | 1 | 0 | 0 |
| <i>mreC</i> | 0 | 1 | 0 | 1 | 0 | 0 |
| <i>asd</i>  | 0 | 1 | 0 | 1 | 0 | 0 |

|             |   |   |   |   |   |   |
|-------------|---|---|---|---|---|---|
| <i>glyQ</i> | 0 | 1 | 0 | 1 | 0 | 0 |
| <i>rnpA</i> | 0 | 1 | 0 | 1 | 0 | 1 |
| <i>hemG</i> | 0 | 1 | 0 | 1 | 0 | 0 |
| <i>secE</i> | 0 | 1 | 0 | 1 | 0 | 0 |
| <i>lexA</i> | 0 | 1 | 0 | 1 | 1 | 0 |
| <i>lptF</i> | 1 | 1 | 1 | 1 | 1 | 0 |
| <i>dnaC</i> | 0 | 1 | 0 | 1 | 0 | 0 |
| <i>ispU</i> | 0 | 2 | 0 | 2 | 0 | 2 |
| <i>rseP</i> | 0 | 2 | 0 | 2 | 0 | 2 |
| <i>yceQ</i> | 0 | 1 | 0 | 1 | 0 | 0 |
| <i>yejM</i> | 1 | 2 | 1 | 2 | 1 | 0 |
| <i>prfB</i> | 0 | 1 | 0 | 1 | 0 | 1 |
| <i>dnaE</i> | 0 | 4 | 0 | 4 | 0 | 4 |

**Table S5.** The  $m/z$  values of the fragments from the AHHHHHH\*L peptide (the asterisk indicates L-homoarginine) observed in the MS/MS spectrum of Figure 1D.

| $m/z$<br>(calculated) | $m/z$<br>(observed) | b |      | y | $m/z$<br>(calculated) | $m/z$<br>(observed) |
|-----------------------|---------------------|---|------|---|-----------------------|---------------------|
|                       | ---                 | 1 | A    | 9 | ---                   |                     |
| 209.1                 | 209.1               | 2 | H    | 8 | 1124.6                | 1124.6              |
| 346.1                 | 346.2               | 3 | H    | 7 | 987.5                 | 987.5               |
| 483.2                 | 483.2               | 4 | H    | 6 | 850.5                 | 850.3               |
| 620.2                 | 620.3               | 5 | H    | 5 | 713.4                 | 713.3               |
| 757.3                 | 757.3               | 6 | H    | 4 | 576.3                 | 576.2               |
| 894.5                 | 894.4               | 7 | H    | 3 | 439.3                 | 439.2               |
| 1064.5                | 1064.5              | 8 | hArg | 2 | 302.2                 | 302.2               |
|                       | ---                 | 9 | L    | 1 | 132.1                 |                     |

**Table S6.** The 7 synonymous AGG replacements in B-95.ΔA. These replacements were accomplished by oligonucleotide-mediated recombination. The changed bases are shown in red, except for those introduced by the C-to-C mismatches, which are shown in green. The AGG codons are underlined.

---

|             |                                                             |
|-------------|-------------------------------------------------------------|
| <i>mreC</i> | AGG to CGG                                                  |
| before      | TGCTAATCGCTCTCCACAA <u>AGG</u> GCTACGCCGCCGCAAAGT           |
| after       | TGCTAATCGT <u>AGCCC</u> GCAAC <u>CGG</u> GCTACGCCGCCGCAAAGT |
| <i>ligA</i> | AGG to CGT                                                  |
| before      | TCCCGACGCTGAATACGAC <u>AGG</u> GCTGATGCGCGAACTGCGC          |
| after       | TCCCGACGCTGAATACGAT <u>CGTT</u> AATGCGCGAACTGCGC            |
| <i>mrdB</i> | AGG to CGC                                                  |
| before      | AATGTCAATCCACACCCACAG <u>GAAAAT</u> GTTGTCGAAAAGC           |
| after       | AATGTCAATCCACACCCAC <u>CG</u> <u>CAAAAT</u> GTTGTCGAAAAGC   |
| note        | <i>PrlpA</i> -10 box is written in enclosed characters.     |
| <i>ispE</i> | AGG to CGC                                                  |
| before      | CCCGCGCAATACGCCAAAA <u>AGG</u> TCAATAGAAACGTTGCTA           |
| after       | CCCGCGCAATACGCCAAAA <u>CGC</u> TCAATAGAAACGTTGCTA           |
| <i>asnS</i> | AGG to CGC                                                  |
| before      | CATTCTCGAAAACCTGCGGC <u>AGG</u> AAGTTTGAAAACCCGGTT          |
| after       | CATTCTCGAAAACCTGCGGC <u>CGC</u> AAGTTTGAAAACCCGGTT          |
| <i>ispB</i> | AGG to CGC                                                  |
| before      | GGATGAATCAGATATGCGC <u>AGG</u> GGTAAAGCTACCGCCAAC           |
| after       | GGATGAATCAGATATGCGC <u>CGC</u> GGTAAAGCTACCGCCAAC           |
| <i>pssA</i> | AGG to CGC                                                  |
| before      | CGCGTTGTATGAAGCTAAA <u>AGG</u> CAGCGTCCGGAACCTGGAT          |
| after       | CGCGTTGTATGAAGCTAAA <u>CGC</u> CAGCGTCCGGAACCTGGAT          |

---

**Table S7.** The sequence modifications to the B-95.ΔA chromosome made in this study. The base changes were performed by oligonucleotide-mediated recombination. The original and modified sequences are designated as “before” and “after”, respectively, on the left. The modified genes are listed in the order of the actual engineering steps. The changed bases are shown in red, except for those introduced by the C-to-C mismatches, which are shown in green. The engineered codons are underlined.

---

|             |                                                             |
|-------------|-------------------------------------------------------------|
| <i>pheT</i> | AGG to CGA by 8-nucleotide insertion                        |
| before      | TCCAGGCATCATTG <u>AGGG</u> GATTGAACCTatggcg                 |
| after       | TCCAGGCATCATTG <u>CGAGACTA</u> AGGGATTGAACCTatggcg          |
| note        | The <i>infA</i> ORF is written in lowercase letters.        |
| <br>        |                                                             |
| <i>dnaC</i> | AGG to CGC                                                  |
| before      | GGCGATGAAAGATACCTTC <u>AGGA</u> AATAGCGGTACCAGCGAA          |
| after       | GGCGATGAAAGATACCTTC <u>CGC</u> AATAGCGGTACCAGCGAA           |
| <br>        |                                                             |
| <i>yejM</i> | AGG/AGG to CGC/CGC                                          |
| before      | TCGTCGGCTCCCAG <u>AGG</u> CTGATG <u>AGG</u> TTTTTTGTCCGTCAT |
| after       | TCGTCGGCTCCCAG <u>CGC</u> CTGATG <u>CGC</u> TTTTTTGTCCGTCAT |
| <br>        |                                                             |
| <i>lexA</i> | AGG to AGA                                                  |
| before      | AATGAAAGCGTTAACGGCC <u>AGG</u> CAACAAGAGGTGTTTGAT           |
| after       | AATGAAAGCGTT <u>GACTGCG</u> <u>AG</u> CAACAAGAGGTGTTTGAT    |
| <br>        |                                                             |
| <i>coaE</i> | AGG to CGC                                                  |
| before      | CCCGGGAATATAAATTATG <u>AGG</u> TATATAGTTGCCTTAACG           |
| after       | CCCGGGAATATAAATTATG <u>CGC</u> TATATAGTTGCCTTAACG           |
| <br>        |                                                             |
| <i>trmD</i> | AGAAGA to CGTCGT                                            |
| before      | TGGGCCGTACCTGGCTT <u>AGAAG</u> ACCTGAACTTCTGGAAAA           |
| after       | TGGGCCGTACCTGGT <u>GCGTCGT</u> CCTGAACTTCTGGAAAA            |
| <br>        |                                                             |
| <i>trmD</i> | AGG to CGA                                                  |
| before      | TCTGACTGAAGAGCAAGCA <u>AGG</u> TTGCTGGCGGAGTTCAAA           |
| after       | TCTGACTGAAGAGCAAGC <u>CCGACTTT</u> TGGCGGAGTTCAAA           |

*hemG* AGG to CGG  
before ATTAATTCCTTTTCTCAACAAGGGACGGACAAACGCGCGAG  
after ATTAATTCCTTTTTAGTACTCGGGACGGACAAACGCGCGAG

*ribF* AGG to CGT  
before GCTGTGCGTGCGTTTTCGACAGGCGTTTCGCGGCGTTAACC  
after GCTGTGCGTGCGTTTTGATCGTTCGCTTTTCGCGGCGTTAACC

*asd* ATCAGG to GTGAAG  
before CGGATTAATAATGGCATCAGGACTTTTGTGGCGGTAAC  
after CGGATTAATAATGGCGTGAAGACTTTTGTGGCGGTAAC  
note Ile127-Arg128 was changed to Val127-Lys128 which is found in other *asd* genes.

*lpxC* AGG to CGT  
before TAATACGATGATCAAACAAAGGACACTTAAACGTATCGTT  
after TAATACGATGATCAAGCAGCGTACTTTGAAACGTATCGTT

*folC* AGGAGA to CGTCGC by 8-nucleotide insertion  
before TGATTGACGCGAGGAGAAGCGgtggcaagtaa  
after TGATTGACGCGCGTCGCTCAGGAGGTTAAgtggcaagtaa  
note Since the 8-base insertion (in red, left) shifted the coding frame, “AAGCG” at the 3’ end of *folC* was changed to “GTTAA” to create the TAA stop signal (underlined) for premature termination.  
note The *dedD* ORF is written in lowercase letters.

*secE* AGG to CGG by 8-nucleotide insertion  
before TTTATCACTGGCCTGAGGTTCTGAGatgtctg  
after TTTATCACTGGCCTGCGGTTTTGAGGTTCTGAGatgtctg  
note The *nusG* ORF is written in lowercase letters.

*dnaT* AGA to CGT by 8-nucleotide insertion  
before ATTCCACCAGGATTCAGAGGGTAACGatgaaa  
after ATTCCACCAGGATTCCGTGGTTAAGAGGGTAACGatgaaa  
note The *dnaC* ORF is written in lowercase letters.



*holB* AGA to CGA  
before tgaaggagtggacgcatgaGATGGTATCCATGGTTACGA  
after tgaaggagtggattaTGCGATGGTATCCATGGTTACGA  
note The *tmk* ORF is written in lowercase letters.  
note Since the AGA-to-CGA change eliminated the original stop codon (TGA) of *tmk*, a TAA stop signal (the first 2 bases shown in red, left) was created immediately upstream of the TGA.

*yceQ* AGG to CGA  
before AAAATTTCTTGTTTTAACAAGGATGGACACGGAAACGGCC  
after AAAATTTT~~AGT~~CC~~TT~~ACTCGAATGGACACGGAAACGGCC

*ftsI* AGG to CGT  
before ACGGTGGTCTGACATAGAGAGGGCCACCTTCTCTTTTCGGC  
after ACGGTGGTCTGACAT~~TGA~~AC~~GT~~AC~~GACT~~TTCTCTTTTCGGC  
note An oligo-derived spontaneous mutation (A413T) was introduced.

*lptC* AGA to CGG  
before GAGCTGATTGA~~AAAGGT~~TAGAACATCCTatgaaattcaaa  
after GAGCTGATTGA~~AAAGGT~~ACGGACCA~~GT~~Tatgaaattcaaa  
note The *lptA* ORF is written in lowercase letters.  
note The *PlptB* -35 box is enclosed.

*ftsL* AGG to CGT  
before CGACCATAGCCGGGTGGAAAGGATCGCCACGGAAAAGCTG  
after CGACCATAGCCGGGT~~TGA~~G~~CGT~~AT~~TGC~~GACGGAAAAGCTG

*dnaG* AGG to CGT  
before CCAGATCGAGCGCCATCAGAGGCAAACGCTTTATCAGTTG  
after CCAGATCGAGCGCCA~~CCA~~AC~~GT~~CA~~GACC~~CTTTATCAGTTG

*minE* Correction of the off-target mutation in the *minE* gene  
before GGTAACCGTACAGCTTGAGCCAAAAGATGGCGATATTTCT  
after GGTAACCGTACA~~ATT~~GGA~~ACAG~~AAAAGATGGCGATATTTCT  
note Pro at position 67 was corrected to be Gln.

*cca* AGA to CGC  
before TGAAATTCGCGATTTAGCCAGACTGGTGGCTGAGTTTCAC  
after TGAAATTCGCGATTTAGCCGCTTAGTGGCTGAGTTTCAC

*lptF* AGG to CGT  
before CTTCTGTCAAAGTTAGTGAGGATCCTCGGCGCAGCGGTT  
after CTTCTGTCAAAGTTAGTGCGTATTCTGGGGCAGCGGTT

*ftsB* AGG to CGG  
before TAATGAACTCAGCATGACCAGGCCGGGCGAACTTTTTAT  
after TAATGAACTGTCGATGACCCGGCCGGGCGAACTTTTTAT

*glyQ* AGG to CGT  
before TATGCAAAGTTTGATACCAGGACCTTCCAGGGCTTGATC  
after TATGCAAAGTTTGATACCGTACGTTCAGGGCTTGATC

---

**Table S8.** The off-target mutations occurring in AGG-27.1. These mutations were revealed by the whole-genome sequencing. The obtained sequences were compared with the standard genome sequence of BL21(DE3). The last three mutations are not present in the parent B-95.ΔA, and must have occurred during the engineering of AGG-27.1. The repeating DNA sequences, including rDNA, insertion elements, and *rhs* genes, were not completely mapped in this sequence analyses.

| Annotation                | Position  | Type          | Reference | Sequenced |
|---------------------------|-----------|---------------|-----------|-----------|
| <i>acrB(I65I)</i>         | 453255    | Substitution  | G         | A         |
| <i>flgF(A19V)</i>         | 1136454   | Substitution  | C         | T         |
| <i>yebT(V66V)</i>         | 1863432   | Substitution  | T         | C         |
| <i>vioA(A338V)</i>        | 2006172   | Substitution  | G         | A         |
| <i>yicI(H304L)</i>        | 3701104   | Substitution  | T         | G         |
| <i>yjiPQ(L576L)</i>       | 4478852   | Substitution  | T         | A         |
| <i>cdaR(L52L)</i>         | 185461    | Substitution  | G         | A         |
| upstream of <i>sulA</i>   | 1026026   | Substitution  | T         | C         |
| terminator of <i>pspF</i> | 1353260   | Substitution  | G         | A         |
| <i>dcp(ΔA)</i>            | 1575919   | Deletion      | T         |           |
| <i>yfbS(L39L)</i>         | 2298490   | Substitution  | A         | G         |
| <i>hemX(P389PAP)</i>      | 3878170-1 | Insertion     |           | GGTGCA    |
| <i>tolQ(L130L)</i>        | 734203    | Substitution  | C         | T         |
| <i>yjhB(ΔT)</i>           | 4415207   | Deletion      | T         |           |
| <i>ftsI(A413T)</i>        | 95454     | Substitution  | G         | A         |
| IS1 before <i>fepE</i>    | 578621-19 | IS1 insertion |           |           |
| <i>yohGH(T19T)</i>        | 2123535   | Substitution  | G         | T         |
